# Supplementary material
Source: HighWire-hosted journal article supplement (https://bmjopen.bmj.com/content/12/1/e053534)
Supplement: inline-supplementary-material-1 [file inline-supplementary-material-1.pdf]

Table S1: Search strategy for PubMed

|   |    |                                                                                                                                                                                                                                                                                                                                                                                                                                                                                                                                                                                                                                                                                                                                                                                                                                                                                                                                                                                                                                                                                                                                                                                                                                                                           |
|---|----|---------------------------------------------------------------------------------------------------------------------------------------------------------------------------------------------------------------------------------------------------------------------------------------------------------------------------------------------------------------------------------------------------------------------------------------------------------------------------------------------------------------------------------------------------------------------------------------------------------------------------------------------------------------------------------------------------------------------------------------------------------------------------------------------------------------------------------------------------------------------------------------------------------------------------------------------------------------------------------------------------------------------------------------------------------------------------------------------------------------------------------------------------------------------------------------------------------------------------------------------------------------------------|
| 1 | #1 | Search: Quality of Life[Mesh] OR quality of life[tiab] OR life qualit*[tiab] OR living qualit*[tiab] OR quality of living[tiab] OR Activities of Daily Living[Mesh] OR activities of daily living[tiab] OR activity of daily living[tiab] OR activities of daily life[tiab] OR activity of daily life[tiab] OR daily living activit*[tiab] OR daily life activit*[tiab] OR adl[tiab] OR chronic limitation of activity[tiab] OR self care*[tiab] OR Health Status[Mesh] OR health status[tiab] OR level of health[tiab] OR health level*[tiab] OR qol[tiab] OR hrql[tiab] OR hrqol[tiab]                                                                                                                                                                                                                                                                                                                                                                                                                                                                                                                                                                                                                                                                                  |
| 2 | #2 | Search: food hypersensitivity[Mesh] OR food intolerance[Mesh] OR food allerg*[tw] OR food hypersensitivit*[tw] OR food intolerance*[tw] OR food sensitivit*[tw]                                                                                                                                                                                                                                                                                                                                                                                                                                                                                                                                                                                                                                                                                                                                                                                                                                                                                                                                                                                                                                                                                                           |
| 3 | #3 | Search: (HR-PRO[tiab] OR HRPRO[tiab] OR HRQL[tiab] OR HRQoL[tiab] OR QL[tiab] OR QoL[tiab] OR quality of life[tw] OR life quality[tw] OR health index*[tiab] OR health indices[tiab] OR health profile*[tiab] OR health status[tw] OR ((patient[tiab] OR self[tiab] OR child[tiab] OR parent[tiab] OR carer[tiab] OR proxy[tiab]) AND ((report[tiab] OR reported[tiab] OR reporting[tiab]) OR (rated[tiab] OR rating[tiab] OR ratings[tiab]) OR based[tiab] OR (assessed[tiab] OR assessment[tiab] OR assessments[tiab]))) OR ((disability[tiab] OR function[tiab] OR functional[tiab] OR functions[tiab] OR subjective[tiab] OR utility[tiab] OR utilities[tiab] OR wellbeing[tiab] OR well being[tiab]) AND (index[tiab] OR indices[tiab] OR instrument[tiab] OR instruments[tiab] OR measure[tiab] OR measures[tiab] OR questionnaire[tiab] OR questionnaires[tiab] OR profile[tiab] OR profiles[tiab] OR scale[tiab] OR scales[tiab] OR score[tiab] OR scores[tiab] OR status[tiab] OR survey[tiab] OR surveys[tiab])))                                                                                                                                                                                                                                               |
| 4 | #4 | Search: (instrumentation[sh] OR methods[sh] OR Validation Studies[pt] OR Comparative Study[pt] OR psychometrics[Mesh] OR psychometr*[tiab] OR clinimetr*[tw] OR clinometr*[tw] OR outcome assessment, health care[Mesh] OR outcome assessment[tiab] OR outcome measure*[tw] OR observer variation[Mesh] OR observer variation[tiab] OR Health Status Indicators[Mesh] OR reproducibility of results[Mesh] OR reproducib*[tiab] OR discriminant analysis[Mesh] OR reliab*[tiab] OR unreliab*[tiab] OR valid*[tiab] OR coefficient of variation[tiab] OR coefficient[tiab] OR homogeneity[tiab] OR homogeneous[tiab] OR internal consistency[tiab] OR (cronbach*[tiab] AND (alpha[tiab] OR alphas[tiab])) OR (item[tiab] AND (correlation*[tiab] OR selection*[tiab] OR reduction*[tiab])) OR agreement[tw] OR precision[tw] OR imprecision[tw] OR precise values[tw] OR test-retest[tiab] OR (test[tiab] AND retest[tiab]) OR (reliab*[tiab] AND (test[tiab] OR retest[tiab])) OR stability[tiab] OR interrater[tiab] OR inter-rater[tiab] OR intrarater[tiab] OR intra-rater[tiab] OR intertester[tiab] OR inter-tester[tiab] OR intratester[tiab] OR intra-tester[tiab] OR interobserver[tiab] OR inter-observer[tiab] OR intraobserver[tiab] OR intra-observer[tiab] OR |

## Reference:

1. Vissers T, Vries RD. Quality of life (QoL) search block Amsterdam: Afdeling Biomedische Informatiespecialisten; 2020 [updated March 23, 2020; cited 2021 May 5]. Available from: <https://blocks.bmi-online.nl/catalog/294> accessed May 5 2021.
2. Mackintosh A, Comabella CCI, Hadi M, et al. PROM GROUP CONSTRUCT & INSTRUMENT TYPE FILTERS Oxford: University of Oxford; 2010 [updated February, 2010; cited 2021 May 5]. Available from: <https://cosmin.nl/wp-content/uploads/prom-search-filter-oxford-2010.pdf> accessed May 5 2021.
3. Terwee CB, Jansma EP, Riphagen II, et al. Development of a Methodological PubMed Search Filter for Finding Studies on Measurement Properties of Measurement Instruments. *Quality of Life Research* 2009;18(8):1115-23. doi: 10.1007/s11136-009-9528-5

|   |    |                                                                                                                                                                                                                                                                                                                                                                                                                                                                                                                                                                                                                                                                                                                                                                                                                                                                                                                                                                                                                                                                                                                                                                                                                                                                                                                                                                                                                                                                                                                                                                                                                                                                                                                                                                                                                                                                                                                                                                                                                                                                                                                                                                                       |
|---|----|---------------------------------------------------------------------------------------------------------------------------------------------------------------------------------------------------------------------------------------------------------------------------------------------------------------------------------------------------------------------------------------------------------------------------------------------------------------------------------------------------------------------------------------------------------------------------------------------------------------------------------------------------------------------------------------------------------------------------------------------------------------------------------------------------------------------------------------------------------------------------------------------------------------------------------------------------------------------------------------------------------------------------------------------------------------------------------------------------------------------------------------------------------------------------------------------------------------------------------------------------------------------------------------------------------------------------------------------------------------------------------------------------------------------------------------------------------------------------------------------------------------------------------------------------------------------------------------------------------------------------------------------------------------------------------------------------------------------------------------------------------------------------------------------------------------------------------------------------------------------------------------------------------------------------------------------------------------------------------------------------------------------------------------------------------------------------------------------------------------------------------------------------------------------------------------|
|   |    | <p>intertechnician[tiab] OR inter-technician[tiab] OR intratechnician[tiab] OR intra-technician[tiab] OR interexaminer[tiab] OR inter-examiner[tiab] OR intraexaminer[tiab] OR intra-examiner[tiab] OR interassay[tiab] OR inter-assay[tiab] OR intraassay[tiab] OR intra-assay[tiab] OR interindividual[tiab] OR inter-individual[tiab] OR intraindividual[tiab] OR intra-individual[tiab] OR interparticipant[tiab] OR inter-participant[tiab] OR intraparticipant[tiab] OR intra-participant[tiab] OR kappa[tiab] OR kappa's[tiab] OR kappas[tiab] OR repeatab*[tw] OR ((replicab*[tw] OR repeated[tw]) AND (measure[tw] OR measures[tw] OR findings[tw] OR result[tw] OR results[tw] OR test[tw] OR tests[tw])) OR generaliza*[tiab] OR generalisa*[tiab] OR concordance[tiab] OR (intraclass[tiab] AND correlation*[tiab]) OR discriminative[tiab] OR known group[tiab] OR factor analysis[tiab] OR factor analyses[tiab] OR factor structure[tiab] OR factor structures[tiab] OR dimension*[tiab] OR subscale*[tiab] OR (multitrait[tiab] AND scaling[tiab] AND (analysis[tiab] OR analyses[tiab])) OR item discriminant[tiab] OR interscale correlation*[tiab] OR error[tiab] OR errors[tiab] OR individual variability[tiab] OR interval variability[tiab] OR rate variability[tiab] OR (variability[tiab] AND (analysis[tiab] OR values[tiab])) OR (uncertainty[tiab] AND (measurement[tiab] OR measuring[tiab])) OR standard error of measurement[tiab] OR sensitiv*[tiab] OR responsive*[tiab] OR (limit[tiab] AND detection[tiab]) OR minimal detectable concentration[tiab] OR interpretab*[tiab] OR ((minimal[tiab] OR minimally[tiab] OR clinical[tiab] OR clinically[tiab]) AND (important[tiab] OR significant[tiab] OR detectable[tiab]) AND (change[tiab] OR difference[tiab])) OR (small*[tiab] AND (real[tiab] OR detectable[tiab]) AND (change[tiab] OR difference[tiab])) OR meaningful change[tiab] OR ceiling effect[tiab] OR floor effect[tiab] OR Item response model[tiab] OR IRT[tiab] OR Rasch[tiab] OR Differential item functioning[tiab] OR DIF[tiab] OR computer adaptive testing[tiab] OR item bank[tiab] OR cross-cultural equivalence[tiab])</p> |
| 5 | #5 | <p>Search: (addresses[pt] OR biography[pt] OR case reports[pt] OR comment[pt] OR directory[pt] OR editorial[pt] OR festschrift[pt] OR interview[pt] OR lectures[pt] OR legal cases[pt] OR legislation[pt] OR letter[pt] OR news[pt] OR newspaper article[pt] OR patient education handout[pt] OR popular works[pt] OR congresses[pt] OR consensus development conference[pt] OR consensus development conference, nih[pt] OR practice guideline[pt]) NOT (animals[Mesh] NOT humans[Mesh])</p>                                                                                                                                                                                                                                                                                                                                                                                                                                                                                                                                                                                                                                                                                                                                                                                                                                                                                                                                                                                                                                                                                                                                                                                                                                                                                                                                                                                                                                                                                                                                                                                                                                                                                         |
| 6 | #6 | #1 AND #2 AND #3 AND #4 NOT #5                                                                                                                                                                                                                                                                                                                                                                                                                                                                                                                                                                                                                                                                                                                                                                                                                                                                                                                                                                                                                                                                                                                                                                                                                                                                                                                                                                                                                                                                                                                                                                                                                                                                                                                                                                                                                                                                                                                                                                                                                                                                                                                                                        |

## Note:

#1: The search blocks of quality of life for medical and health bibliographic databases compiled by Dutch medical information specialists is accessible from <https://blocks.bmi-online.nl/catalog/294>

#3: The search filter for finding PROMs developed by the University of Oxford is accessible from <https://cosmin.nl/wp-content/uploads/prom-search-filter-oxford-2010.pdf>

#4 and #5: The sensitive PubMed search filter for measurement properties developed by Terwee et al., and corresponding translated search filters for other databases are accessible from <https://www.cosmin.nl/tools/pubmed-search-filters/?portfolioCats=14>

## Reference:

1. Vissers T, Vries RD. Quality of life (QoL) search block Amsterdam: Afdeling Biomedische Informatiespecialisten; 2020 [updated March 23, 2020; cited 2021 May 5]. Available from: <https://blocks.bmi-online.nl/catalog/294> accessed May 5 2021.
2. Mackintosh A, Comabella CCI, Hadi M, et al. PROM GROUP CONSTRUCT & INSTRUMENT TYPE FILTERS Oxford: University of Oxford; 2010 [updated February, 2010; cited 2021 May 5]. Available from: <https://cosmin.nl/wp-content/uploads/prom-search-filter-oxford-2010.pdf> accessed May 5 2021.
3. Terwee CB, Jansma EP, Riphagen II, et al. Development of a Methodological PubMed Search Filter for Finding Studies on Measurement Properties of Measurement Instruments. *Quality of Life Research* 2009;18(8):1115-23. doi: 10.1007/s11136-009-9528-5

**Table S2. Characteristics of the included PROMs<sup>1</sup>**

| PROM <sup>1</sup> | Developer(s)/ year developed | Construct(s) | Target population | Mode of administration | Recall period | (Sub)scale (s) (number of items) | Response options | Range of scores/scoring | Original language | Available translations |
|-------------------|------------------------------|--------------|-------------------|------------------------|---------------|----------------------------------|------------------|-------------------------|-------------------|------------------------|
| A                 |                              |              |                   |                        |               |                                  |                  |                         |                   |                        |
| B                 |                              |              |                   |                        |               |                                  |                  |                         |                   |                        |
| .....             |                              |              |                   |                        |               |                                  |                  |                         |                   |                        |

Note: 1. PROM(s) = Patient-reported outcome measure(s). In this study, PROM(s) refers to the disease-specific HRQL instrument(s) for patients with food allergy or/and food intolerance and their caregivers.

**Table S3. Characteristics of the included study populations**

| PROM <sup>1</sup> | Reference | Population |                           |                 | Disease characteristics |                                 |                  | Instrument administration |         |          | Response rate |
|-------------------|-----------|------------|---------------------------|-----------------|-------------------------|---------------------------------|------------------|---------------------------|---------|----------|---------------|
|                   |           | N          | Age Mean (SD, range) year | Gender % female | Disease                 | Disease duration mean (SD) year | Disease severity | Setting                   | Country | Language |               |
| A                 | 1         |            |                           |                 |                         |                                 |                  |                           |         |          |               |
|                   | 2         |            |                           |                 |                         |                                 |                  |                           |         |          |               |
|                   | 3         |            |                           |                 |                         |                                 |                  |                           |         |          |               |
| .....             |           |            |                           |                 |                         |                                 |                  |                           |         |          |               |
| B                 | 1         |            |                           |                 |                         |                                 |                  |                           |         |          |               |
|                   | .....     |            |                           |                 |                         |                                 |                  |                           |         |          |               |

Note: 1. PROM(s) = Patient-reported outcome measure(s). In this study, PROM(s) refers to the disease-specific HRQL instrument(s) for patients with food allergy or/and food intolerance and their caregivers.

## References:

- Mokkink LB, Prinsen CAC, Patrick DL, et al. COSMIN methodology for systematic reviews of Patient-Reported Outcome Measures (PROMs) - user manual Netherlands: COSMIN; 2018 [updated February 2018; cited 2021 May 5]. Available from: [https://cosmin.nl/wp-content/uploads/COSMIN-syst-review-for-PROMs-manual\\_version-1\\_feb-2018.pdf](https://cosmin.nl/wp-content/uploads/COSMIN-syst-review-for-PROMs-manual_version-1_feb-2018.pdf) accessed May 5 2021.
- Prinsen CA, Mokkink LB, Bouter LM, et al. COSMIN guideline for systematic reviews of patient-reported outcome measures. *Quality of Life Research* 2018;27(5):1147-57. doi: 10.1007/s11136-018-1798-3

Table S4. Rating<sup>1</sup> of the PROMs<sup>2</sup> development

| PROM <sup>2</sup> | PROM design                 |                           |                                                          |                      |                                                             |                                  | Cognitive interview (CI) study <sup>4</sup> |                                                                 |                   |                   | TOTAL PROM DEVELOPMENT | Reference |                |
|-------------------|-----------------------------|---------------------------|----------------------------------------------------------|----------------------|-------------------------------------------------------------|----------------------------------|---------------------------------------------|-----------------------------------------------------------------|-------------------|-------------------|------------------------|-----------|----------------|
|                   | General design requirements |                           |                                                          |                      |                                                             | Concept elicitation <sup>3</sup> | Total PROM design                           | General design requirements                                     | Comprehensibility | Comprehensiveness |                        |           | Total CI study |
|                   | Clear construct             | Clear origin of construct | Clear target population for which the PROM was developed | Clear context of use | PROM developed in sample representing the target population |                                  |                                             | CI study performed in sample representing the target population |                   |                   |                        |           |                |
| A                 |                             |                           |                                                          |                      |                                                             |                                  |                                             |                                                                 |                   |                   |                        |           |                |
| B                 |                             |                           |                                                          |                      |                                                             |                                  |                                             |                                                                 |                   |                   |                        |           |                |
| .....             |                             |                           |                                                          |                      |                                                             |                                  |                                             |                                                                 |                   |                   |                        |           |                |

Note: 1. Ratings (filled in cells): V = very good, A = adequate, D = doubtful, I = inadequate.

2. PROM(s) = Patient-reported outcome measure(s). In this study, PROM(s) refers to the disease-specific HRQL instrument(s) for patients with food allergy or/and food intolerance and their caregivers.

3. The concept elicitation will not be further rated if the PROM(s) was not developed in the sample representing the target population;

4. Empty cells indicate that a CI study (or part of it) was not performed.

#### References:

1. Terwee CB, Prinsen CAC, Chiarotto A, et al. COSMIN methodology for evaluating the content validity of patient-reported outcome measures: a Delphi study. *Qual Life Res* 2018;27(5):1159-70. doi: 10.1007/s11136-018-1829-0
2. Terwee CB, Prinsen CA, Chiarotto A, et al. COSMIN methodology for assessing the content validity of PROMs - User manual Amsterdam, The Netherlands: COSMIN; 2018 [updated February 2018; cited 2021 April 27]. Available from: <https://cosmin.nl/wp-content/uploads/COSMIN-methodology-for-content-validity-user-manual-v1.pdf> accessed April 27 2021.



Table S5-1. Rating of the content validity of PROMs<sup>1</sup>

| PROM<br>(Reference – study type/Rating<br>of reviewers) | Content Validity                                                  |                                                                                        |                                                                                     |                                          |                                      |                                |                                   |                                       |                                                                                    |                                                                                                  |                                             |                                                 |                                       | CONTENT<br>VALIDITY RATING <sup>3</sup> |
|---------------------------------------------------------|-------------------------------------------------------------------|----------------------------------------------------------------------------------------|-------------------------------------------------------------------------------------|------------------------------------------|--------------------------------------|--------------------------------|-----------------------------------|---------------------------------------|------------------------------------------------------------------------------------|--------------------------------------------------------------------------------------------------|---------------------------------------------|-------------------------------------------------|---------------------------------------|-----------------------------------------|
|                                                         | Relevance <sup>2</sup>                                            |                                                                                        |                                                                                     |                                          |                                      | Comprehensiveness <sup>2</sup> |                                   | Comprehensibility <sup>2</sup>        |                                                                                    |                                                                                                  |                                             |                                                 |                                       |                                         |
|                                                         | 1. Are the included items relevant for the construct of interest? | 2. Are the included items relevant for the target population of interest? <sup>4</sup> | 3. Are the included items relevant for the context of use of interest? <sup>4</sup> | 4. Are the response options appropriate? | 5. Is the recall period appropriate? | RELEVANCE RATING <sup>3</sup>  | 6. Are all key concepts included? | COMPREHENSIVENESS RATING <sup>3</sup> | 7. Are the PROM instructions understood by the population of interest as intended? | 8. Are the PROM items and response options understood by the population of interest as intended? | 9. Are the PROM items appropriately worded? | 10. Do the response options match the question? | COMPREHENSIBILITY RATING <sup>3</sup> |                                         |
| A (Ref 1- PROM development study)                       |                                                                   |                                                                                        |                                                                                     |                                          |                                      |                                |                                   |                                       |                                                                                    |                                                                                                  |                                             |                                                 |                                       |                                         |
| A (Ref 2 - Content validity study)                      |                                                                   |                                                                                        |                                                                                     |                                          |                                      |                                |                                   |                                       |                                                                                    |                                                                                                  |                                             |                                                 |                                       |                                         |
| A (Ref 3 - Content validity study)                      |                                                                   |                                                                                        |                                                                                     |                                          |                                      |                                |                                   |                                       |                                                                                    |                                                                                                  |                                             |                                                 |                                       |                                         |
| Rating of reviewers                                     |                                                                   |                                                                                        |                                                                                     |                                          |                                      |                                |                                   |                                       |                                                                                    |                                                                                                  |                                             |                                                 |                                       |                                         |
| B (Ref 1- PROM development study)                       |                                                                   |                                                                                        |                                                                                     |                                          |                                      |                                |                                   |                                       |                                                                                    |                                                                                                  |                                             |                                                 |                                       |                                         |
| B (Ref 2 - Content validity study)                      |                                                                   |                                                                                        |                                                                                     |                                          |                                      |                                |                                   |                                       |                                                                                    |                                                                                                  |                                             |                                                 |                                       |                                         |
| Rating of reviewers                                     |                                                                   |                                                                                        |                                                                                     |                                          |                                      |                                |                                   |                                       |                                                                                    |                                                                                                  |                                             |                                                 |                                       |                                         |
| .....                                                   |                                                                   |                                                                                        |                                                                                     |                                          |                                      |                                |                                   |                                       |                                                                                    |                                                                                                  |                                             |                                                 |                                       |                                         |

Note: 1. PROM(s) = Patient-reported outcome measure(s). In this study, PROM(s) refers to the disease-specific HRQL instrument(s) for patients with food allergy or/and food intolerance and their caregivers.

2. Ratings (filled in white cells) for the 10 criteria for relevance, comprehensiveness, comprehensibility can be + / - /± / ? : ‘ + ’= sufficient, ‘ - ’= insufficient, ‘ ± ’= inconsistent, ‘ ? ’=indeterminate.

3. The RELEVANCE, COMPREHENSIVENESS, COMPREHENSIBILITY, AND CONTENT VALIDITY ratings (filled in gray cells) can be + / - /± / ? : ‘ + ’= sufficient, ‘ - ’= insufficient, ‘ ± ’= inconsistent, ‘ ? ’=indeterminate.

## References:

1. Terwee CB, Prinsen CAC, Chiarotto A, et al. COSMIN methodology for evaluating the content validity of patient-reported outcome measures: a Delphi study. *Qual Life Res* 2018;27(5):1159-70. doi: 10.1007/s11136-018-1829-0
2. Terwee CB, Prinsen CA, Chiarotto A, et al. COSMIN methodology for assessing the content validity of PROMs - User manual Amsterdam, The Netherlands: COSMIN; 2018 [updated February 2018; cited 2021 April 27]. Available from: <https://cosmin.nl/wp-content/uploads/COSMIN-methodology-for-content-validity-user-manual-v1.pdf> accessed April 27 2021.

**Table S6. Quality of the PROMs<sup>1</sup> and quality of the evidence for measurement properties of the PROMs<sup>1</sup> (Summary of findings)**

| Measurement properties                                             | PROM <sup>1</sup> A       |                               |                                  | PROM <sup>1</sup> B       |                               |                                  | .....                     |                               |                                  |
|--------------------------------------------------------------------|---------------------------|-------------------------------|----------------------------------|---------------------------|-------------------------------|----------------------------------|---------------------------|-------------------------------|----------------------------------|
|                                                                    | Summary or pooled results | Overall rating <sup>2,3</sup> | Quality of evidence <sup>4</sup> | Summary or pooled results | Overall rating <sup>2,3</sup> | Quality of evidence <sup>4</sup> | Summary or pooled results | Overall rating <sup>2,3</sup> | Quality of evidence <sup>4</sup> |
| <b>Content validity<sup>2</sup></b>                                |                           |                               |                                  |                           |                               |                                  |                           |                               |                                  |
| <i>Relevance<sup>2</sup></i>                                       |                           |                               |                                  |                           |                               |                                  |                           |                               |                                  |
| <i>Comprehensiveness<sup>2</sup></i>                               |                           |                               |                                  |                           |                               |                                  |                           |                               |                                  |
| <i>Comprehensibility<sup>2</sup></i>                               |                           |                               |                                  |                           |                               |                                  |                           |                               |                                  |
| <b>Structural validity<sup>3</sup></b>                             |                           |                               |                                  |                           |                               |                                  |                           |                               |                                  |
| <b>Internal consistency<sup>3</sup></b>                            |                           |                               |                                  |                           |                               |                                  |                           |                               |                                  |
| <b>Cross-cultural validity /measurement invariance<sup>3</sup></b> |                           |                               |                                  |                           |                               |                                  |                           |                               |                                  |
| <b>Reliability<sup>3</sup></b>                                     |                           |                               |                                  |                           |                               |                                  |                           |                               |                                  |
| <b>Measurement error<sup>3</sup></b>                               |                           |                               |                                  |                           |                               |                                  |                           |                               |                                  |
| <b>Criterion validity<sup>3</sup></b>                              |                           |                               |                                  |                           |                               |                                  |                           |                               |                                  |
| <b>Construct validity<sup>3</sup></b>                              |                           |                               |                                  |                           |                               |                                  |                           |                               |                                  |
| <b>Responsiveness<sup>3</sup></b>                                  |                           |                               |                                  |                           |                               |                                  |                           |                               |                                  |

Note: Empty cells indicate that the information is not provided by included studies.

1. PROM(s) = Patient-reported outcome measure(s). In this study, PROM(s) refers to the disease-specific HRQL instrument(s) for patients with food allergy or/and food intolerance and their caregivers.

2. Overall ratings (filled in gray cells) for the content validity (relevance, comprehensiveness, comprehensibility) can only be + / - /±: ‘+’= sufficient, ‘-’= insufficient, ‘±’= inconsistent.

3. Overall ratings (filled in white cells) for other measurement properties can be + / - /±/ ? : ‘+’= sufficient, ‘-’= insufficient, ‘±’ = inconsistent, ‘?’ =indeterminate.

4. Ratings for quality of evidence: High, Moderate, Low, Very low.

#### References:

1. Mokkink LB, Prinsen CAC, Patrick DL, et al. COSMIN methodology for systematic reviews of Patient-Reported Outcome Measures (PROMs) - user manual Netherlands: COSMIN; 2018 [updated February 2018; cited 2021 May 5]. Available from: [https://cosmin.nl/wp-content/uploads/COSMIN-syst-review-for-PROMs-manual\\_version-1\\_feb-2018.pdf](https://cosmin.nl/wp-content/uploads/COSMIN-syst-review-for-PROMs-manual_version-1_feb-2018.pdf) accessed May 5 2021.
2. Terwee CB, Prinsen CA, Chiarotto A, et al. COSMIN methodology for assessing the content validity of PROMs - User manual Amsterdam, The Netherlands: COSMIN; 2018 [updated February 2018; cited 2021 April 27]. Available from: <https://cosmin.nl/wp-content/uploads/COSMIN-methodology-for-content-validity-user-manual-v1.pdf> accessed April 27 2021.

**Table S7. Information on interpretability of the PROMs<sup>1</sup>**

| <b>PROM (Reference)</b> | <b>Distribution of the instruments scores in the study population</b> | <b>Percentage of missing items and percentage of missing total scores</b> | <b>Floor and ceiling effects</b> | <b>Scores and change scores available for relevant (sub)groups</b> | <b>Minimal important change (MIC) or minimal important difference (MID)</b> | <b>Information on response shift</b> |
|-------------------------|-----------------------------------------------------------------------|---------------------------------------------------------------------------|----------------------------------|--------------------------------------------------------------------|-----------------------------------------------------------------------------|--------------------------------------|
| A (Ref 1)               |                                                                       |                                                                           |                                  |                                                                    |                                                                             |                                      |
| A (Ref 2)               |                                                                       |                                                                           |                                  |                                                                    |                                                                             |                                      |
| A (Ref 3)               |                                                                       |                                                                           |                                  |                                                                    |                                                                             |                                      |
| .....                   |                                                                       |                                                                           |                                  |                                                                    |                                                                             |                                      |
| B (Ref 1)               |                                                                       |                                                                           |                                  |                                                                    |                                                                             |                                      |
| .....                   |                                                                       |                                                                           |                                  |                                                                    |                                                                             |                                      |

Note: 1. PROM(s) = Patient-reported outcome measure(s). In this study, PROM(s) refers to the disease-specific HRQL instrument(s) for patients with food allergy or/and food intolerance and their caregivers.

## References:

1. Mokkink LB, Prinsen CAC, Patrick DL, et al. COSMIN methodology for systematic reviews of Patient-Reported Outcome Measures (PROMs) - user manual Netherlands: COSMIN; 2018 [updated February 2018; cited 2021 May 5]. Available from: [https://cosmin.nl/wp-content/uploads/COSMIN-syst-review-for-PROMs-manual\\_version-1\\_feb-2018.pdf](https://cosmin.nl/wp-content/uploads/COSMIN-syst-review-for-PROMs-manual_version-1_feb-2018.pdf) accessed May 5 2021.



**Table S8. Information on feasibility of the PROMs<sup>1</sup>**

| Feasibility aspects                                  | PROM A | PROM B | ..... |
|------------------------------------------------------|--------|--------|-------|
| Patient's comprehensibility                          |        |        |       |
| Clinician's comprehensibility                        |        |        |       |
| Type and ease of administration                      |        |        |       |
| Length of the instrument                             |        |        |       |
| Completion time                                      |        |        |       |
| Patient's required mental and physical ability level |        |        |       |
| Ease of standardization                              |        |        |       |
| Ease of score calculation                            |        |        |       |
| Copyright                                            |        |        |       |
| Cost of an instrument                                |        |        |       |
| Required equipment                                   |        |        |       |
| Availability in different settings                   |        |        |       |
| Regulatory agency's requirement for approval         |        |        |       |

Note: 1. PROM(s) = Patient-reported outcome measure(s). In this study, PROM(s) refers to the disease-specific HRQL instrument(s) for patients with food allergy or/and food intolerance and their caregivers.

## References:

1. Morkink LB, Prinsen CAC, Patrick DL, et al. COSMIN methodology for systematic reviews of Patient-Reported Outcome Measures (PROMs) - user manual Netherlands: COSMIN; 2018 [updated February 2018; cited 2021 May 5]. Available from: [https://cosmin.nl/wp-content/uploads/COSMIN-syst-review-for-PROMs-manual\\_version-1\\_feb-2018.pdf](https://cosmin.nl/wp-content/uploads/COSMIN-syst-review-for-PROMs-manual_version-1_feb-2018.pdf) accessed May 5 2021.
