# Supplementary material
Source: HighWire-hosted journal article supplement (https://bmjopen.bmj.com/content/12/1/e053534)
Supplement: inline-supplementary-material-2 [file inline-supplementary-material-2.pdf]

Table S9: Search strategy for Embase

|   |    |                                                                                                                                                                                                                                                                                                                                                                                                                                                                                                                                                                                                                                                                                                                                                                                                                                                                                                                                                                                                                                                                                                                                                                                                                                                                                                                                                                                                                                                                                                                                                                                                          |
|---|----|----------------------------------------------------------------------------------------------------------------------------------------------------------------------------------------------------------------------------------------------------------------------------------------------------------------------------------------------------------------------------------------------------------------------------------------------------------------------------------------------------------------------------------------------------------------------------------------------------------------------------------------------------------------------------------------------------------------------------------------------------------------------------------------------------------------------------------------------------------------------------------------------------------------------------------------------------------------------------------------------------------------------------------------------------------------------------------------------------------------------------------------------------------------------------------------------------------------------------------------------------------------------------------------------------------------------------------------------------------------------------------------------------------------------------------------------------------------------------------------------------------------------------------------------------------------------------------------------------------|
| 1 | #1 | Search: 'quality of life'/exp OR (life NEXT/1 qualit*):ab,ti OR 'quality of life':ab,ti OR 'daily life activity'/exp OR 'activities of daily living':ab,ti OR ('daily living' NEXT/1 activit*):ab,ti OR ('daily live' NEXT/1 activit*):ab,ti OR 'adl':ab,ti OR 'chronic limitation of activity':ab,ti OR (self NEXT/1 care*):ab,ti OR 'health status'/exp OR 'health status':ab,ti OR 'level of health':ab,ti OR (health NEXT/1 level*):ab,ti OR 'qol':ab,ti OR 'hrql':ab,ti OR 'hrqol':ab,ti                                                                                                                                                                                                                                                                                                                                                                                                                                                                                                                                                                                                                                                                                                                                                                                                                                                                                                                                                                                                                                                                                                            |
| 2 | #2 | Search: 'food allergy'/exp OR 'nutritional intolerance'/exp OR 'food allerg*' OR 'food hypersensitivit*' OR 'food intolerance*' OR 'food sensitivit*'                                                                                                                                                                                                                                                                                                                                                                                                                                                                                                                                                                                                                                                                                                                                                                                                                                                                                                                                                                                                                                                                                                                                                                                                                                                                                                                                                                                                                                                    |
| 3 | #3 | Search: 'HR-PRO':ab,ti OR 'HRPRO':ab,ti OR 'HRQL':ab,ti OR 'HRQoL':ab,ti OR 'QL':ab,ti OR 'QoL':ab,ti OR 'quality of life':ab,ti OR 'life quality':ab,ti OR (health NEXT/1 index*):ab,ti OR 'health indices':ab,ti OR (health NEXT/1 profile*):ab,ti OR 'health status' OR (('patient':ab,ti OR 'self':ab,ti OR 'child':ab,ti OR 'parent':ab,ti OR 'carer':ab,ti OR 'proxy':ab,ti) AND (('report':ab,ti OR 'reported':ab,ti OR 'reporting':ab,ti) OR ('rated':ab,ti OR 'rating':ab,ti OR 'ratings':ab,ti) OR 'based':ab,ti OR ('assessed':ab,ti OR 'assessment':ab,ti OR 'assessments':ab,ti))) OR (('disability':ab,ti OR 'function':ab,ti OR 'functional':ab,ti OR 'functions':ab,ti OR 'subjective':ab,ti OR 'utility':ab,ti OR 'utilities':ab,ti OR 'wellbeing':ab,ti OR 'well being':ab,ti) AND ('index':ab,ti OR 'indices':ab,ti OR 'instrument':ab,ti OR 'instruments':ab,ti OR 'measure':ab,ti OR 'measures':ab,ti OR 'questionnaire':ab,ti OR 'questionnaires':ab,ti OR 'profile':ab,ti OR 'profiles':ab,ti OR 'scale':ab,ti OR 'scales':ab,ti OR 'score':ab,ti OR 'scores':ab,ti OR 'status':ab,ti OR 'survey':ab,ti OR 'surveys':ab,ti))                                                                                                                                                                                                                                                                                                                                                                                                                                                      |
| 4 | #4 | Search: 'intermethod comparison'/exp OR 'data collection method'/exp OR 'validation study'/exp OR 'feasibility study'/exp OR 'pilot study'/exp OR 'psychometry'/exp OR 'reproducibility'/exp OR reproducib*:ab,ti OR 'audit':ab,ti OR psychometr*:ab,ti OR clinimetr*:ab,ti OR clinometr*:ab,ti OR 'observer variation'/exp OR 'observer variation':ab,ti OR 'discriminant analysis'/exp OR 'validity'/exp OR reliab*:ab,ti OR valid*:ab,ti OR 'coefficient':ab,ti OR 'internal consistency':ab,ti OR (cronbach*:ab,ti AND ('alpha':ab,ti OR 'alphas':ab,ti)) OR 'item correlation':ab,ti OR 'item correlations':ab,ti OR 'item selection':ab,ti OR 'item selections':ab,ti OR 'item reduction':ab,ti OR 'item reductions':ab,ti OR 'agreement':ab,ti OR 'precision':ab,ti OR 'imprecision':ab,ti OR 'precise values':ab,ti OR 'test-retest':ab,ti OR ('test':ab,ti AND 'retest':ab,ti) OR (reliab*:ab,ti AND ('test':ab,ti OR 'retest':ab,ti)) OR 'stability':ab,ti OR 'interrater':ab,ti OR 'inter-rater':ab,ti OR 'intra-rater':ab,ti OR 'intra-rater':ab,ti OR 'intertester':ab,ti OR 'inter-tester':ab,ti OR 'intratester':ab,ti OR 'intratester':ab,ti OR 'interobserver':ab,ti OR 'inter-observer':ab,ti OR 'intraobserver':ab,ti OR 'intraobserver':ab,ti OR 'intertechnician':ab,ti OR 'inter-technician':ab,ti OR 'intratechnician':ab,ti OR 'intratechnician':ab,ti OR 'interexaminer':ab,ti OR 'inter-examiner':ab,ti OR 'intraexaminer':ab,ti OR 'intraexaminer':ab,ti OR 'interassay':ab,ti OR 'inter-assay':ab,ti OR 'intraassay':ab,ti OR 'intra-assay':ab,ti OR 'interindividual':ab,ti |

|   |    |                                                                                                                                                                                                                                                                                                                                                                                                                                                                                                                                                                                                                                                                                                                                                                                                                                                                                                                                                                                                                                                                                                                                                                                                                                                                                                                                                                                                                                                                                                                                                                                                                                                                                                                                                                                                                                                                                                                                                                                                                                                                                                                                                                                                                                                                                                                                                                                                                                                       |
|---|----|-------------------------------------------------------------------------------------------------------------------------------------------------------------------------------------------------------------------------------------------------------------------------------------------------------------------------------------------------------------------------------------------------------------------------------------------------------------------------------------------------------------------------------------------------------------------------------------------------------------------------------------------------------------------------------------------------------------------------------------------------------------------------------------------------------------------------------------------------------------------------------------------------------------------------------------------------------------------------------------------------------------------------------------------------------------------------------------------------------------------------------------------------------------------------------------------------------------------------------------------------------------------------------------------------------------------------------------------------------------------------------------------------------------------------------------------------------------------------------------------------------------------------------------------------------------------------------------------------------------------------------------------------------------------------------------------------------------------------------------------------------------------------------------------------------------------------------------------------------------------------------------------------------------------------------------------------------------------------------------------------------------------------------------------------------------------------------------------------------------------------------------------------------------------------------------------------------------------------------------------------------------------------------------------------------------------------------------------------------------------------------------------------------------------------------------------------------|
|   |    | OR 'inter-individual':ab,ti OR 'intraindividual':ab,ti OR 'intra-individual':ab,ti OR 'interparticipant':ab,ti OR 'inter-participant':ab,ti OR 'intraparticipant':ab,ti OR 'intraparticipant':ab,ti OR 'kappa':ab,ti OR 'kappas':ab,ti OR 'coefficient of variation':ab,ti OR repeatab*:ab,ti OR (replicab*:ab,ti OR 'repeated':ab,ti AND ('measure':ab,ti OR 'measures':ab,ti OR 'findings':ab,ti OR 'result':ab,ti OR 'results':ab,ti OR 'test':ab,ti OR 'tests':ab,ti)) OR generaliza*:ab,ti OR generalisa*:ab,ti OR 'concordance':ab,ti OR ('intraclass':ab,ti AND correlation*:ab,ti) OR 'discriminative':ab,ti OR 'known group':ab,ti OR 'factor analysis':ab,ti OR 'factor analyses':ab,ti OR 'factor structure':ab,ti OR 'factor structures':ab,ti OR 'dimensionality':ab,ti OR subscale*:ab,ti OR 'multitrait scaling analysis':ab,ti OR 'multitrait scaling analyses':ab,ti OR 'item discriminant':ab,ti OR 'interscale correlation':ab,ti OR 'interscale correlations':ab,ti OR ('error':ab,ti OR 'errors':ab,ti AND (measure*:ab,ti OR correlat*:ab,ti OR evaluat*:ab,ti OR 'accuracy':ab,ti OR 'accurate':ab,ti OR 'precision':ab,ti OR 'mean':ab,ti)) OR 'individual variability':ab,ti OR 'interval variability':ab,ti OR 'rate variability':ab,ti OR 'variability analysis':ab,ti OR ('uncertainty':ab,ti AND ('measurement':ab,ti OR 'measuring':ab,ti)) OR 'standard error of measurement':ab,ti OR sensitiv*:ab,ti OR responsive*:ab,ti OR ('limit':ab,ti AND 'detection':ab,ti) OR 'minimal detectable concentration':ab,ti OR interpretab*:ab,ti OR (small*:ab,ti AND ('real':ab,ti OR 'detectable':ab,ti) AND ('change':ab,ti OR 'difference':ab,ti)) OR 'meaningful change':ab,ti OR 'minimal important change':ab,ti OR 'minimal important difference':ab,ti OR 'minimally important change':ab,ti OR 'minimally important difference':ab,ti OR 'minimal detectable change':ab,ti OR 'minimal detectable difference':ab,ti OR 'minimally detectable change':ab,ti OR 'minimally detectable difference':ab,ti OR 'minimal real change':ab,ti OR 'minimal real difference':ab,ti OR 'minimally real change':ab,ti OR 'minimally real difference':ab,ti OR 'ceiling effect':ab,ti OR 'floor effect':ab,ti OR 'item response model':ab,ti OR 'irt':ab,ti OR 'rasch':ab,ti OR 'differential item functioning':ab,ti OR 'dif':ab,ti OR 'computer adaptive testing':ab,ti OR 'item bank':ab,ti OR 'cross-cultural equivalence':ab,ti |
| 5 | #5 | Search: ('addresses':it OR 'biography':it OR 'case reports':it OR 'comment':it OR 'directory':it OR 'editorial':it OR 'festschrift':it OR 'interview':it OR 'lectures':it OR 'legal cases':it OR 'legislation':it OR 'letter':it OR 'news':it OR 'newspaper article':it OR 'patient education handout':it OR 'popular works':it OR 'congresses':it OR 'consensus development conference':it OR 'consensus development conference':it OR 'practice guideline':it) NOT ('animal'/exp NOT 'human'/exp)                                                                                                                                                                                                                                                                                                                                                                                                                                                                                                                                                                                                                                                                                                                                                                                                                                                                                                                                                                                                                                                                                                                                                                                                                                                                                                                                                                                                                                                                                                                                                                                                                                                                                                                                                                                                                                                                                                                                                   |
| 6 | #6 | #1 AND #2 AND #3 AND #4 NOT #5                                                                                                                                                                                                                                                                                                                                                                                                                                                                                                                                                                                                                                                                                                                                                                                                                                                                                                                                                                                                                                                                                                                                                                                                                                                                                                                                                                                                                                                                                                                                                                                                                                                                                                                                                                                                                                                                                                                                                                                                                                                                                                                                                                                                                                                                                                                                                                                                                        |

Table S10: Search strategy for Web of Science

|   |    |                                                                                                                                                                                                                                                                                                                                                                                                                                                                                                                                                                                                                                                                                                                                                                                                                                                                                                                                                                                                                                                                                                                                                                                                                                                                                                                                |
|---|----|--------------------------------------------------------------------------------------------------------------------------------------------------------------------------------------------------------------------------------------------------------------------------------------------------------------------------------------------------------------------------------------------------------------------------------------------------------------------------------------------------------------------------------------------------------------------------------------------------------------------------------------------------------------------------------------------------------------------------------------------------------------------------------------------------------------------------------------------------------------------------------------------------------------------------------------------------------------------------------------------------------------------------------------------------------------------------------------------------------------------------------------------------------------------------------------------------------------------------------------------------------------------------------------------------------------------------------|
| 1 | #1 | Search: TS=("quality of life") OR TS=("life qualit*") OR TS=("living qualit*") OR TS=("quality of living") OR TS=("activities of daily living") OR TS=("activity of daily living") OR TS=("activities of daily life") OR TS=("activity of daily life") OR TS=("daily living activit*") OR TS=("daily life activit*") OR TS=(adl) OR TS=("chronic limitation of activity") OR TS=("self care*") OR TS=("health status") OR TS=("level of health") OR TS=("health level*") OR TS=(qol) OR TS=(hrql) OR TS=(hrqol)                                                                                                                                                                                                                                                                                                                                                                                                                                                                                                                                                                                                                                                                                                                                                                                                                |
| 2 | #2 | Search: TS=("food allerg*") OR TS=("food hypersensitivit*") OR TS=("food intolerance*") OR TS=("food sensitivit*")                                                                                                                                                                                                                                                                                                                                                                                                                                                                                                                                                                                                                                                                                                                                                                                                                                                                                                                                                                                                                                                                                                                                                                                                             |
| 3 | #3 | Search: TS=(HR-PRO) OR TS=(HRPRO) OR TS=(HRQL) OR TS=(HRQoL) OR TS=(QL) OR TS=(QoL) OR ALL=("quality of life") OR ALL=("life quality") OR TS=("health index*") OR TS=("health indices") OR TS=("health profile*") OR ALL=("health status") OR ((TS=(patient) OR TS=(self) OR TS=(child) OR TS=(parent) OR TS=(carer) OR TS=(proxy)) AND (TS=(report) OR TS=(reported) OR TS=(reporting) OR TS=(rated) OR TS=(rating) OR TS=(ratings) OR TS=(based) OR TS=(assessed) OR TS=(assessment) OR TS=(assessments))) OR ((TS=(disability) OR TS=(function) OR TS=(functional) OR TS=(functions) OR TS=(subjective) OR TS=(utility) OR TS=(utilities) OR TS=(wellbeing) OR TS=("well being")) AND (TS=(index) OR TS=(indices) OR TS=(instrument) OR TS=(instruments) OR TS=(measure) OR TS=(measures) OR TS=(questionnaire) OR TS=(questionnaires) OR TS=(profile) OR TS=(profiles) OR TS=(scale) OR TS=(scales) OR TS=(score) OR TS=( scores) OR TS=(status) OR TS=(survey) OR TS=(surveys)))                                                                                                                                                                                                                                                                                                                                          |
| 4 | #4 | Search: TS=(instrumentation) OR TS=(methods) OR TS=("validation stud*") OR TS=("comparative stud*") OR TS=(psychometrics) OR TS=(psychometr*) OR ALL=(clinimetr*) OR ALL=(clinometr*) OR TS=("outcome assessment") OR TS=("outcome measure") OR TS=("observer variation") OR TS=("observer variation") OR TS=("health status indicators") OR TS=("reproducib*") OR TS=("discriminant analysis") OR TS=(reliab*) OR TS=(unreliab*) OR TS=(valid*) OR TS=("coefficient of variation") OR TS=(coefficient) OR TS=(homogeneity) OR TS=(homogeneous) OR TS=("internal consistency") OR ((TS=(alpha) OR TS=(alphas)) AND TS=(cronbach*)) OR ((TS=(correlation*) OR TS=(selection*) OR TS=(reduction*)) AND TS=(item)) OR TS=(agreement) OR TS=(precision) OR TS=(imprecision) OR TS=(precise values) OR TS=(test-retest) OR (TS=(test) AND TS=(retest)) OR ((TS=(test) OR TS=(retest)) AND TS=(reliab*)) OR TS=(stability) OR TS=(interrater) OR TS=(inter-rater) OR TS=(intrarater) OR TS=(intra-rater) OR TS=(intertester) OR TS=(inter-tester) OR TS=(intratester) OR TS=(intra-tester) OR TS=(interobserver) OR TS=(inter-observer) OR TS=(intraobserver) OR TS=(intra-observer) OR TS=(intertechician) OR TS=(inter-technician) OR TS=(intratechician) OR TS=(intra-technician) OR TS=(interexaminer) OR TS=(inter-examiner) OR |

|   |    |                                                                                                                                                                                                                                                                                                                                                                                                                                                                                                                                                                                                                                                                                                                                                                                                                                                                                                                                                                                                                                                                                                                                                                                                                                                                                                                                                                                                                                                                                                                                                                                                                                                                                                                                                                                                                                                                                                                                                                                                          |
|---|----|----------------------------------------------------------------------------------------------------------------------------------------------------------------------------------------------------------------------------------------------------------------------------------------------------------------------------------------------------------------------------------------------------------------------------------------------------------------------------------------------------------------------------------------------------------------------------------------------------------------------------------------------------------------------------------------------------------------------------------------------------------------------------------------------------------------------------------------------------------------------------------------------------------------------------------------------------------------------------------------------------------------------------------------------------------------------------------------------------------------------------------------------------------------------------------------------------------------------------------------------------------------------------------------------------------------------------------------------------------------------------------------------------------------------------------------------------------------------------------------------------------------------------------------------------------------------------------------------------------------------------------------------------------------------------------------------------------------------------------------------------------------------------------------------------------------------------------------------------------------------------------------------------------------------------------------------------------------------------------------------------------|
|   |    | <p>TS=(intraexaminer) OR TS=(intra-examiner) OR TS=(interassay) OR TS=(inter-assay) OR TS=(intraassay) OR TS=(intra-assay) OR TS=(interindividual) OR TS=(inter-individual) OR TS=(intraindividual) OR TS=(intra-individual) OR TS=(interparticipant) OR TS=(inter-participant) OR TS=(intraparticipant) OR TS=(intra-participant) OR TS=(kappa) OR TS=(kappa's) OR TS=(kappas) OR TS=(repeatab*) OR ((ALL=(replicab*) OR ALL=(repeated)) AND (ALL=(measure) OR ALL=(measures) OR ALL=(findings) OR ALL=(result) OR ALL=(results) OR ALL=(test) OR ALL=(tests))) OR TS=(generaliza*) OR TS=(generalisa*) OR TS=(concordance) OR (TS=(intraclass) AND TS=(correlation*)) OR TS=(discriminative) OR TS=(known group) OR TS=(“factor analysis”) OR TS=(“factor analyses”) OR TS=(“factor structure”) OR TS=(“factor structures”) OR TS=(dimension*) OR TS=(subscale*) OR ((TS=(analysis) OR TS=(analyses)) AND TS=(scaling) AND TS=(multitrait)) OR TS=(“item discriminant”) OR TS=(“interscale correlation*”) OR TS=(error) OR TS=(errors) OR TS=(“individual variability”) OR TS=(“interval variability”) OR TS=(“rate variability”) OR ((TS=(values) OR TS=(analysis)) AND TS=(variability)) OR ((TS=(measurement) OR TS=(measuring)) AND TS=(uncertainty)) OR TS=(“standard error of measurement”) OR TS=(sensitiv*) OR TS=(responsive*) OR (TS=(limit) AND TS=(detection)) OR TS=(“minimal detectable concentration”) OR TS=(interpretab*) OR ((TS=(minimal) OR TS=(minimally) OR TS=(clinical) OR TS=(clinically)) AND (TS=(important) OR TS=(significant) OR TS=(detectable)) AND (TS=(change) OR TS=(difference))) OR (TS=(small) AND (TS=(real) OR TS=(detectable)) AND (TS=(change) OR TS=(difference))) OR TS=(“meaningful change”) OR TS=(“ceiling effect”) OR TS=(“floor effect”) OR TS=(“Item response model”) OR TS=(IRT) OR TS=(Rasch) OR TS=(“differential item functioning”) OR TS=(DIF) OR TS=(“computer adaptive testing”) OR TS=(“item bank”) OR TS=(“cross-cultural equivalence”)</p> |
| 5 | #5 | <p>Search: DT=(Art Exhibit Review) OR DT=(Biographical-Item) OR DT=(Chronology) OR DT=(Correction) OR DT=(Correction, Addition) OR DT=(Dance Performance Review) OR DT=(Fiction, Creative Prose) OR DT=(Film Review) OR DT=(Hardware Review) OR DT=(Letter) OR DT=(Meeting Abstract) OR DT=(Meeting Summary) OR DT=(Music Performance Review) OR DT=(Music Score) OR DT=(Music Score Review) OR DT=(News Item) OR DT=(Note) OR DT=(Poetry) OR DT=(Retracted Publication) OR DT=(Retracted Publication) OR DT=(Script) OR DT=(Software Review) OR DT=(Theater Review) OR DT=(TV Review, Radio Review) OR DT=(TV Review, Radio Review Video) OR DT=(Withdrawn Publication)</p>                                                                                                                                                                                                                                                                                                                                                                                                                                                                                                                                                                                                                                                                                                                                                                                                                                                                                                                                                                                                                                                                                                                                                                                                                                                                                                                             |
| 6 | #6 | #1 AND #2 AND #3 AND #4 NOT #5                                                                                                                                                                                                                                                                                                                                                                                                                                                                                                                                                                                                                                                                                                                                                                                                                                                                                                                                                                                                                                                                                                                                                                                                                                                                                                                                                                                                                                                                                                                                                                                                                                                                                                                                                                                                                                                                                                                                                                           |

Table S11: Search strategy for Scopus

|   |    |                                                                                                                                                |
|---|----|------------------------------------------------------------------------------------------------------------------------------------------------|
| 1 | #1 | The search strategy of #1 is the same as that in Web of Science, considering there is no use of Mesh words or Emtree words in these databases. |
| 2 | #2 | The search strategy of #2 is the same as that in Web of Science, considering there is no use of Mesh words or Emtree words in these databases. |
| 3 | #3 | The search strategy of #3 is the same as that in Web of Science.                                                                               |
| 4 | #4 | The search strategy of #4 is the same as that in Web of Science, considering there is no use of Mesh words or Emtree words in these databases. |
| 5 | #5 | #1 AND #2 AND #3 AND #4                                                                                                                        |

Note: The exclusion of some publication types will not be included in the literature search strategy in Scopus, because there is no corresponding filter. This step will be included in Literature Screening step.

Table S12: Search strategy for CINAHL

|   |    |                                                          |
|---|----|----------------------------------------------------------|
| 1 | #1 | The search strategy of #1 is the same as that in PubMed. |
| 2 | #2 | The search strategy of #2 is the same as that in PubMed. |
| 3 | #3 | The search strategy of #3 is the same as that in PubMed. |
| 4 | #4 | The search strategy of #4 is the same as that in PubMed. |
| 5 | #5 | The search strategy of #5 is the same as that in PubMed. |
| 6 | #6 | #1 AND #2 AND #3 AND #4 NOT #5                           |

Table S13: Search strategy for ProQuest (Health &amp; Medical Collection)

|   |    |                                                          |
|---|----|----------------------------------------------------------|
| 1 | #1 | The search strategy of #1 is the same as that in PubMed. |
| 2 | #2 | The search strategy of #2 is the same as that in PubMed. |
| 3 | #3 | The search strategy of #3 is the same as that in PubMed. |
| 4 | #4 | The search strategy of #4 is the same as that in PubMed. |
| 5 | #5 | #1 AND #2 AND #3 AND #4                                  |

Note: The exclusion of some publication types will not be included in the literature search strategy in ProQuest (Health & Medical Collection), because there is no corresponding filter. This step will be included in Literature Screening step.
